# Supplementary material for: Bacterial Adrenergic Sensors Regulate Virulence of Enteric Pathogens in the Gut
Source: PubMed Central journal article supplement (PMC4959670; doi:10.1128/mbio.00826-16), 2016-06-07
Supplement: mbo003162848sf1.pdf [file mbo003162848sf1.pdf]

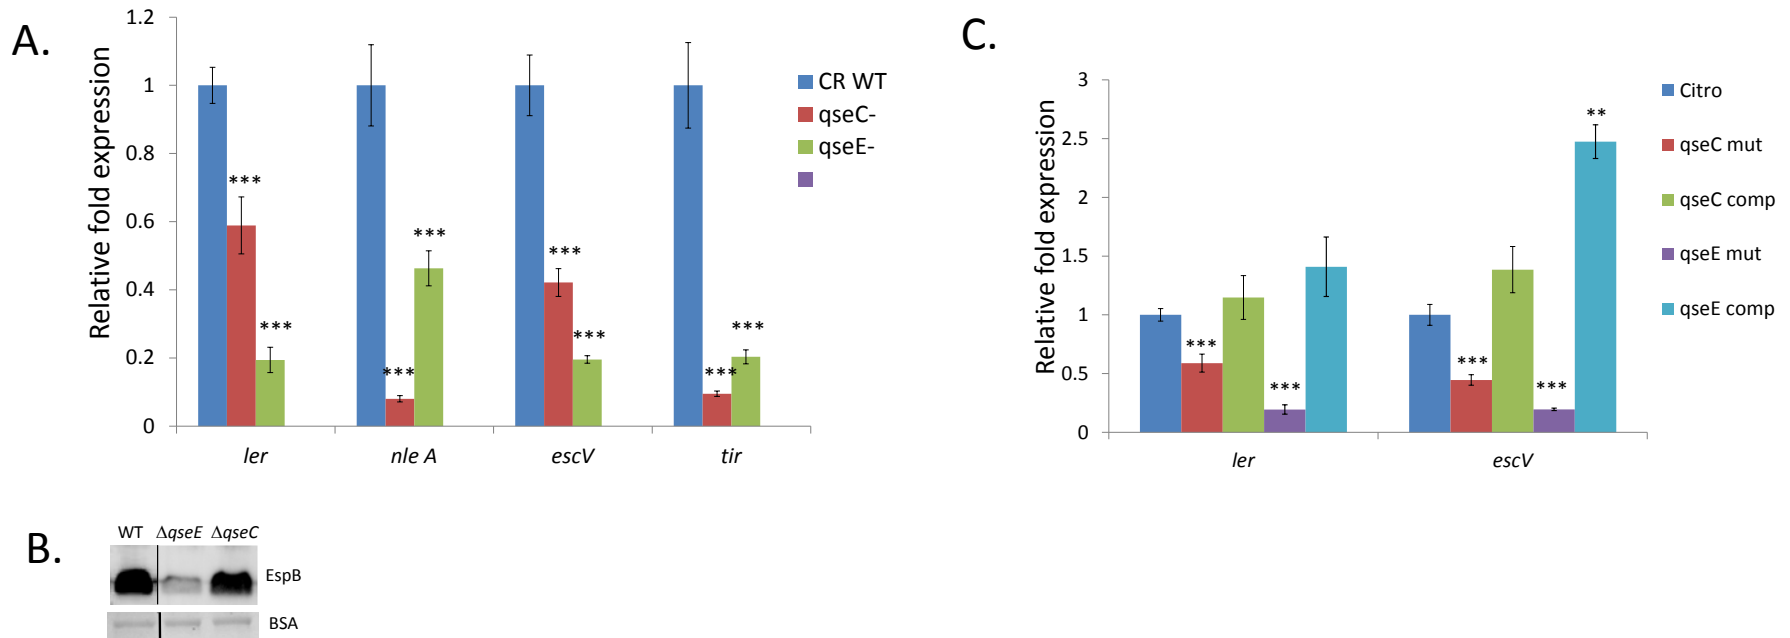

**FIG S1.** LEE gene expression in *C. rodentium*. (A) qRT-PCR of *ler*, *nleA*, *escV* and *tir* in WT,  $\Delta qseC$  and  $\Delta qseE$  in DMEM OD<sub>600</sub> 0.7 at 37°C. (B) Western blot of EspB, from secreted proteins of WT  $\Delta qseC$  and  $\Delta qseE$  *C. rodentium*. BSA is a loading control. (C) qRT-PCR of *ler* and *escV* in WT,  $\Delta qseC$  and  $\Delta qseE$  and the complemented mutants (comp) in DMEM OD<sub>600</sub> 0.7 at 37°C. \*\*\*  $P < 0.001$ ; \*\* $p < 0.01$
