# Supplementary material for: Bacterial Adrenergic Sensors Regulate Virulence of Enteric Pathogens in the Gut
Source: PubMed Central journal article supplement (PMC4959670; doi:10.1128/mbio.00826-16), 2016-06-07
Supplement: mbo003162848sf2.pdf [file mbo003162848sf2.pdf]

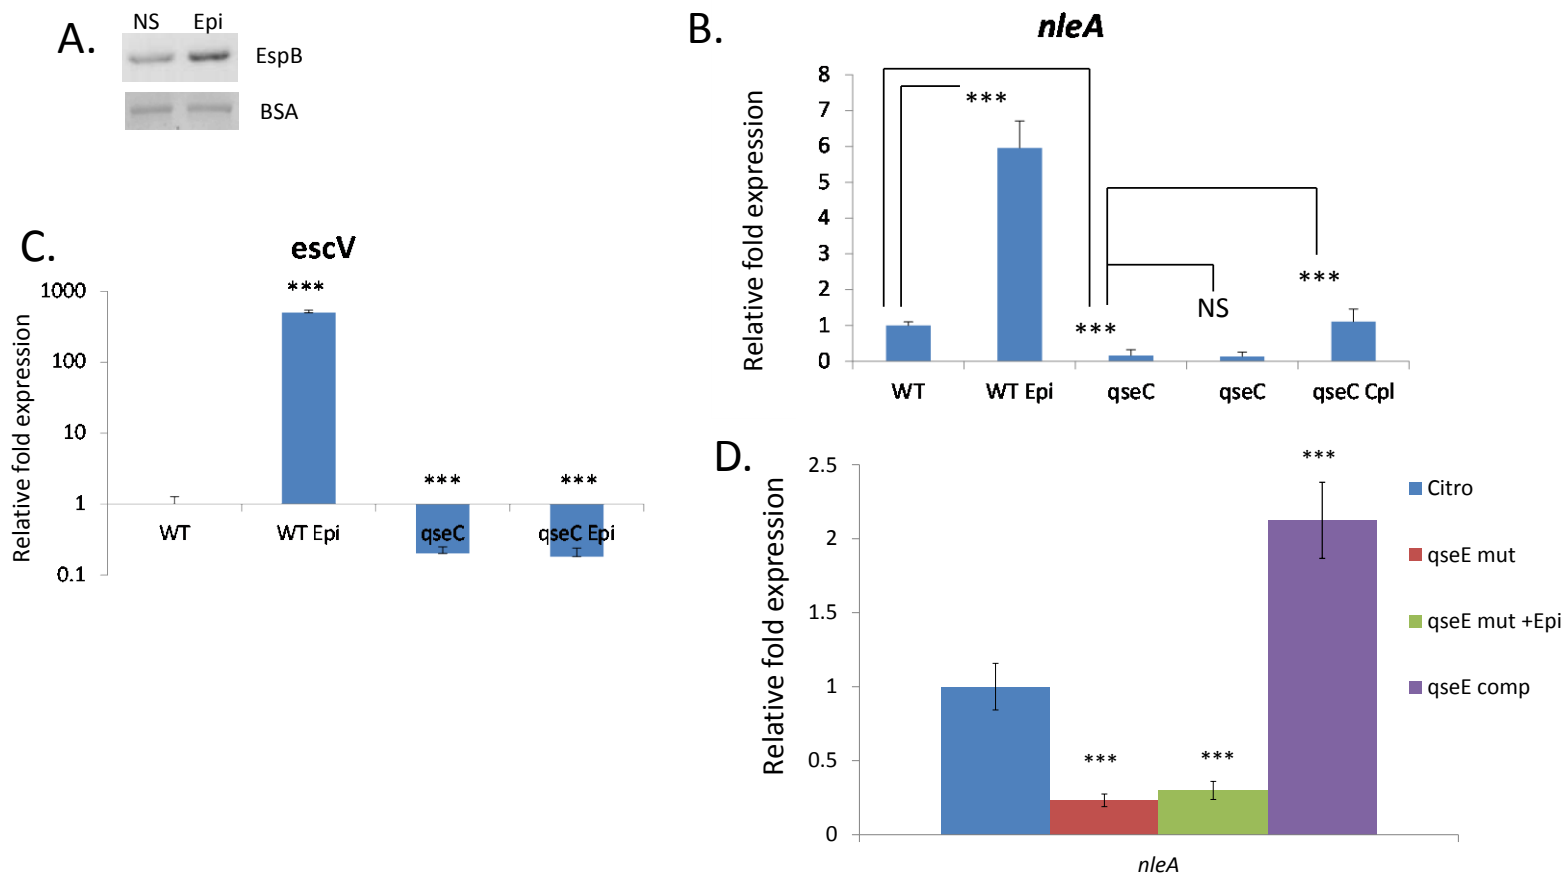

**FIG S2.** LEE gene expression in *C. rodentium* is activated by epinephrine in a QseC and QseE dependent manner. (A) Western blot of EspB, from secreted proteins of WT *C. rodentium* in the absence and presence of 50 $\mu$ M epinephrine. BSA is a loading control. (B) qRT-PCR of *nleA* in WT and  $\Delta qseC$  in the absence and presence of 50 $\mu$ M epinephrine, and in the complemented  $\Delta qseC$  (Cpl) in the absence of epinephrine in DMEM OD<sub>600</sub> 0.7 at 37°C. (C) qRT-PCR of *escV* in WT and  $\Delta qseC$  in the absence and presence of 50 $\mu$ M epinephrine in DMEM OD<sub>600</sub> 0.7 at 37°C. (D) qRT-PCR of *nleA* in WT and  $\Delta qseE$  in the absence and presence of 50 $\mu$ M epinephrine in DMEM OD<sub>600</sub> 0.7 at 37°C. \*\*\*  $P < 0.001$
