# Supplementary material for: Bacterial Adrenergic Sensors Regulate Virulence of Enteric Pathogens in the Gut
Source: PubMed Central journal article supplement (PMC4959670; doi:10.1128/mbio.00826-16), 2016-06-07
Supplement: mbo003162848sf3.pdf [file mbo003162848sf3.pdf]

A.

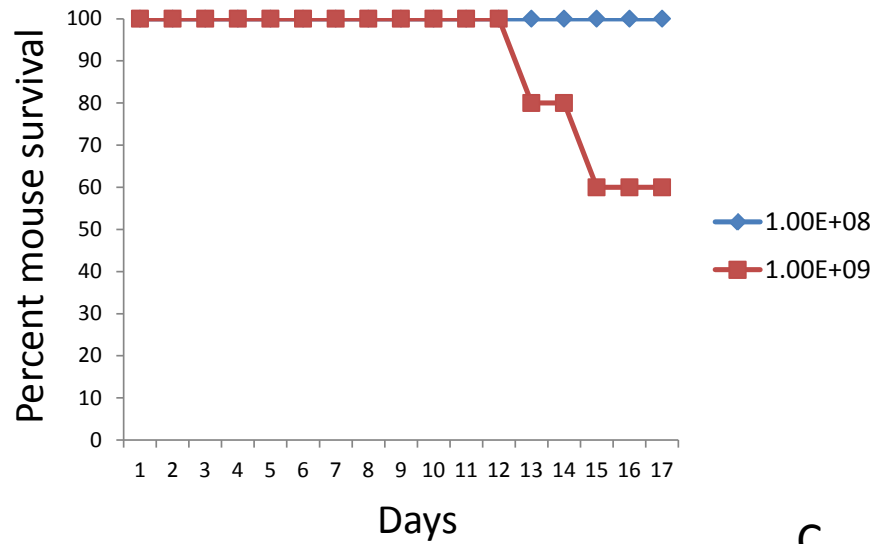

B.

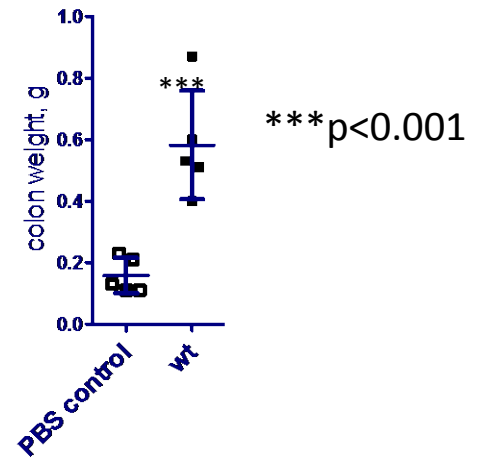

C.

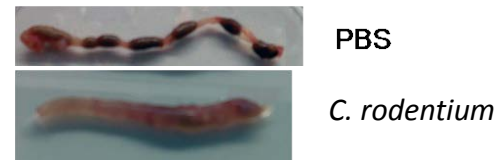

**FIG S3.** *C. rodentium* Infection of 129x1/SvJ mice. (A) Survival curves. (B) Colon weights day 7 post infection. (C) Gross pathology of colons at day 7 post infection.
